# Supplementary material for: Ultrafast high-capacity capture and release of uranium by a light-switchable nanotextured surface
Source: Royal Society of Chemistry journal article supplement (doi:10.1039/d1na00277e), 2021-01-01
Supplement: d1na00277e1.pdf [file d1na00277e1.pdf]

## Supplementary Section

# Ultrafast High-Capacity Capture-and-Release of Uranium by a Light- Switchable Nano-Textured Surface

Ella Borberg<sup>1</sup>, Reut Meir<sup>1,2</sup>, Larisa Burstein<sup>3</sup>, Vadim Krivitsky<sup>1</sup> and Fernando Patolsky<sup>1,4\*</sup>.

1. School of Chemistry, Faculty of Exact Sciences, Tel Aviv University, Tel Aviv, 69978, Israel.
2. Department of Analytical Chemistry, Nuclear Research Centre Negev, Beer-Sheva, 84190, Israel.
3. The Wolfson Applied Materials Research Centre, Tel-Aviv University, Tel-Aviv 69978, Israel
4. Department of Materials Science and Engineering, the Iby and Aladar Fleischman Faculty of Engineering, Tel Aviv University, Tel Aviv 69978, Israel.

## Materials and Chemicals

Acetone [9005-68, J.T.Baker], Isopropanol [9079-05, J.T.Baker], Deionized water [18 M $\Omega$ ·cm], Phosphate buffer [PB, 10 mM, pH 8.5], Phosphate buffer [SB, 155  $\mu$ M, ~pH 8.0], Glutaraldehyde solution [50 wt.% in H<sub>2</sub>O, G7651, Sigma-Aldrich], (3-aminopropyl)-dimethyl-ethoxysilane [APDMES, SIA0603.0-5g, Gelest], silicon wafer [Polished, P-type, <100>, 1-10 $\Omega$ cm, 380 $\pm$ 15 $\mu$ m thickness, Wafer Pro], 1-ethyl-3-(3-dimethylaminopropyl)carbodiimide (EDC) [03450, Sigma-Aldrich] N-hydroxysulfosuccinimide sodium salt (sulfo-NHS) [56485, Sigma-Aldrich], Toluene [244511, Sigma-Aldrich], phosphate-buffered saline (PBS) tablets [P4417, Sigma-Aldrich], 3-hydroxypropionic acid [792659, Sigma-Aldrich], Uranyl specific 5'carboxy ssDNA aptamer (5'-COOH-CTGCA GAATT CTAAT ACGAC TCACT ATAGG AAGAG ATGGC GACAT CTCTG CAGTC GGGTA GTTAA ACCGA CCTTC AGACA TAGGC AGGCG TATAT CTTGT GACGG TAAGC TTGGC AC-3') [IDT synteza]. Arsenic specific 5'carboxy ssDNA aptamer (5'-COOH- GGTA ATAC GACT CACT ATAG GGAG ATAC CAGC TTAT TCAA TTTT ACAG AACACCACCA ACGT CGCT CCGG GTAC TTCT TCAT CGAG ATAG TAAG TGCA ATCT-3') [IDT synteza]. Spot urine samples were collected from healthy volunteers, and used within 10 hours from collection after verifying that urine samples were within normal levels using a 12-parameter urine test strip [DUS 12AC, One Step]. Samples were filtered using a syringe-filter with a cellulose acetate membrane [0.45  $\mu$ m, 16555, Sartorius] and then spiked with stock solutions of uranyl.

## Fabrication of SiNP array using metal-assisted etching<sup>1</sup>

The steps utilized in the fabrication of SiNP array are as follows:

1. Wash silicon substrate with acetone and isopropanol, dry with N<sub>2</sub>.
2. Preparation of 1% polystyrene beads suspension solution: 100  $\mu$ l of 10% polystyrene beads suspension (0.5 $\mu$ m, Sigma) centrifuged at 4500 rpm for 16 minutes. Separate the polystyrene beads from water and add 1 ml of 3% w/w TWEEN 80 in methanol. Disperse suspension with shaking.
3. Deposition of the polystyrene beads: 18 $\mu$ l (for 4 cm<sup>2</sup> wafer) of suspension solution to the center of wafer, and start spin coating. Adjust the spin rate and time according to wafer dimension (4 cm<sup>2</sup>:1 minute at 475 rpm; 16 cm<sup>2</sup>: 2 minutes at 180 rpm).
4. Polystyrene beads plasma etching, O<sub>2</sub> = 50sccm, 40mtorr, 30W, 6 minutes.
5. E-beam Ag-film deposition, 45 nm, 1  $\text{Å}/\text{sec}$ .

6. Silicon wafer wet etching: 4.6 M HF, 0.44 M H<sub>2</sub>O<sub>2</sub>, 9 minutes for 3 μm.
7. Ag-wet etching: 20 μl HNO<sub>3</sub> (69 %), 30 seconds, Wash with DIW.
8. Plasma 10 minutes, 100W, 0.200 Torr O<sub>2</sub>.

#### **Fabrication of BSiNP array using chemical vapor deposition**

1. Wash array with acetone and isopropanol, dry with N<sub>2</sub>.
2. Plasma 10 minutes, 100W, 0.200 Torr O<sub>2</sub>.
3. Electroless gold deposition: soaked for 30 minutes in 20% DIW, 80% ethanol, 0.05M HF, 110uM NaAuCl<sub>4</sub>, 1% tween 80.
4. CVD SiNW synthesis: p-type for 2 minutes ,20 sccm argon, 5 sccm SiH<sub>4</sub>, 25 torr at 460°C.
5. Gold wet etching: 100 μl gold etchant [GE-8148, Transene], 2 minutes, Wash with DIW.

#### **Preparation of 8-acetoxy-pyrene-1,3,6-trisulfonyl chloride out of 1-hydroxypyrene-1,3,6-trisulfonate (HPTS)<sup>2</sup>**

1. Dissolve 20 gr trisodium-1-hydroxypyrene-1,3,6-trisulfonate was in 30 ml NaOH (2 M).
2. Cool to about 0 °C.
3. Add 5 gr acetic anhydride (4.8 ml) dropwise.
4. Stir for 2 hours.
5. Add 20 ml ethanol.
6. Filtrate precipitate and wash three times with 10 ml ethanol.
7. Dry precipitate under reduced pressure for 24 hours.
8. Place 5 gr of precipitate with 150 ml toluene in a round-bottomed flask, equipped with an automatic water separator (Dean-Stark trap) and a condenser.
9. Reflux for 2 hours.
10. Cool to about 60 °C.
11. Add 6ml oxalyl chloride and 2 drops of dimethylformamide
12. Reflux for 8 hours.
13. Filtrate to remove the precipitate.
14. Remove the solvent under reduced pressure.
15. Dry solid residue under vacuum for 24 hours.

### **Aptamer and HPTS immobilization on SiNP array.**

The Antibodies and HPTS modification were done in the following steps:

1. Wash array with acetone, isopropanol, and DIW. Dry gently with N<sub>2</sub>.
2. Plasma 10 minutes, 100W, 0.200 Torr O<sub>2</sub>.
3. APDMES modification: 100% APDMES, room temperature, 2 hours. In glove box (argon environment).
4. Wash with isopropanol.
5. Dehydration: 115 °C, 30 minutes.
6. HPTS modification: Soak in 8-acetoxy-pyrene-1,3,6-trisulfonyl chloride and pyridine in 10ml toluene, 12 hours.
7. Removal of acetic group: Soak in sodium acetate, 30 minutes, then in isopropanol 50% w/w, 15 minutes finally soak in isopropanol 15 minutes. Dry in 110<sup>0</sup>C, 30 minutes.
8. DNA immobilization: Soak in 600 μL of 7.5 μM DNA aptamer, 183 μM sulfo-NHS, and 70 μM EDC in phosphate buffer (10 mM. pH 7.1), 12 hours.
9. Wash phosphate buffer (10 mM, pH 7.1).
10. Blocking: Soak in 600 μL of 90 mM 3-hydroxypropionic acid, 180 mM sulfo-NHS, and 0.9 M EDC in phosphate buffer (10 mM. pH 7.1), 3 hours.
11. Wash phosphate buffer (10 mM, pH 7.1).

### **Optical Measurements**

A series of experiments were performed by a commercial fluorescence scanner (TECAN Infinite M200).

### **Concentrated salts solution**

NaCl 6.1 g/L, MgCl<sub>2</sub> 1.3 g/L, Na<sub>2</sub>SO<sub>4</sub> 1.0 g/L, CaCl<sub>2</sub> 290 mg/L, KCl 173 mg/L, NaHCO<sub>3</sub> 50 mg/L, and H<sub>3</sub>BO<sub>3</sub> 7 mg/L.

### Reusability of BSiNPs platform

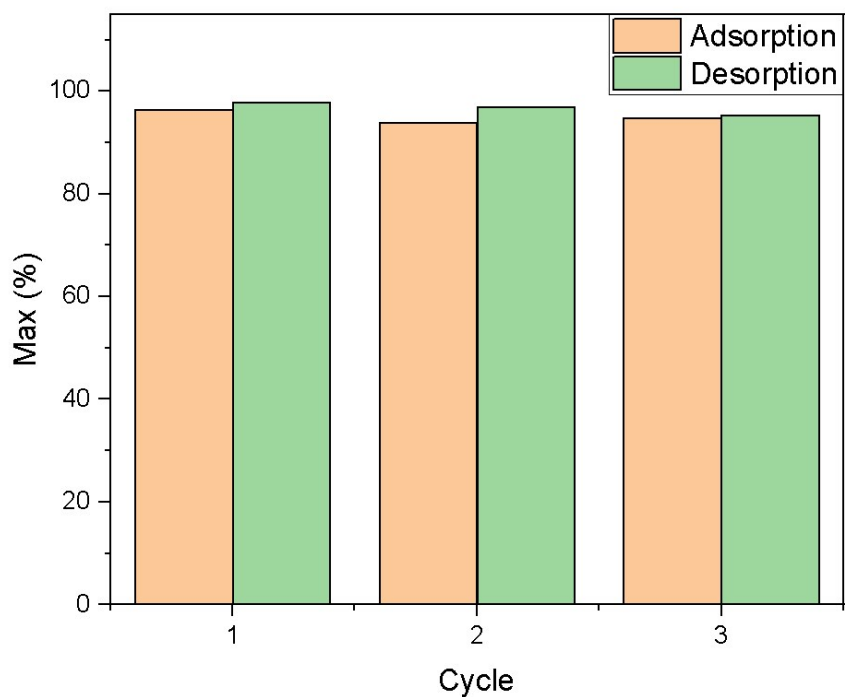

**Figure S1:** Effectiveness of uranyl capture and release for several cycles on the same array.

### Uranyl precipitation test

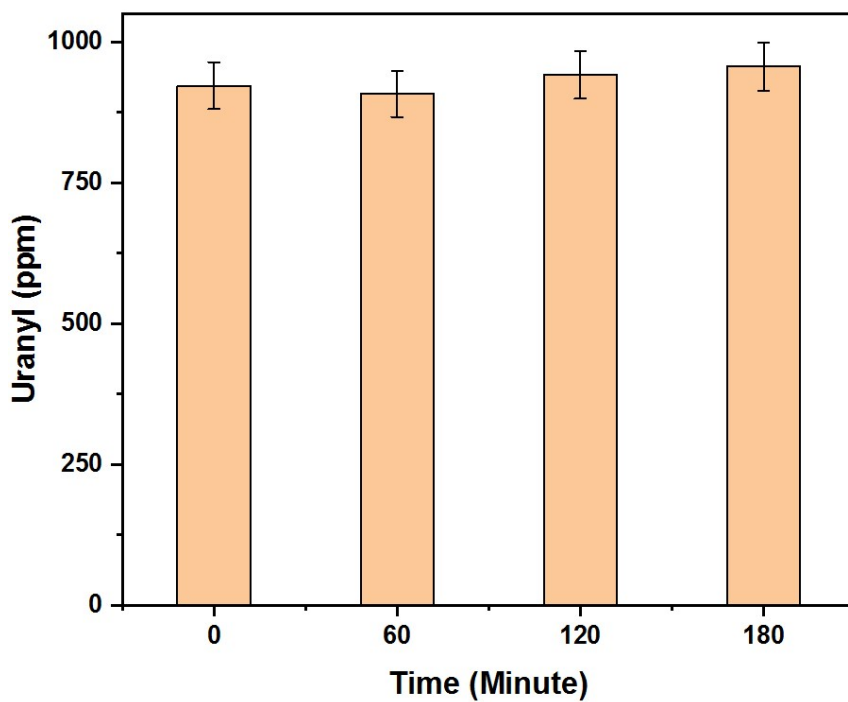

**Figure S2:** Uranyl concentration over time in phosphate buffer 10mM pH 8.5.

## X-ray photoelectron spectroscopy

X-ray Photoelectron Spectroscopy (XPS) measurements were performed in UHV ( $2.5 \times 10^{-10}$  Torr base pressure) using 5600 Multi-Technique System (PHI, USA). The samples were irradiated with an Al  $K_{\alpha}$  monochromated source (1486.6 eV) and the outcome electrons were analyzed by a 'Spherical Capacitor Analyzer' using the slit aperture of 0.8 mm. Some samples were charged during measurements and this charging was compensated by using a charge neutralizer and additional mathematical peak shifting, with SiO<sub>2</sub> at 103.0 eV taken as an energy reference for all the peaks.

### *Performed Measurements:*

Survey: spectrum in a wide energy range (0 - 1400 eV). It gives an estimation of the elements present on the sample surface and is taken at a low resolution.

Utility Multiplex: spectra taken for different peaks in a low energy range window at an Intermediate (Utility) Resolution. It is taken for all the elements present for the atomic concentration (AC%) calculation. An AC table is given as an output of these measurements.

High-Resolution Multiplex: spectra taken for different peaks in a low energy range window at a High Resolution (PE = 11.75 eV, 0.05 eV/step). These measurements allow precise energy position and peak shape determination, necessary for bond bonding analysis.

| AC range   | Accuracy |
|------------|----------|
| Around 50% | ±2%      |
| Around 20% | ±5%      |
| Around 5%  | ±10%     |
| Around 1%  | ±20%     |

**Table S1:** AC calculation accuracy by AC range.

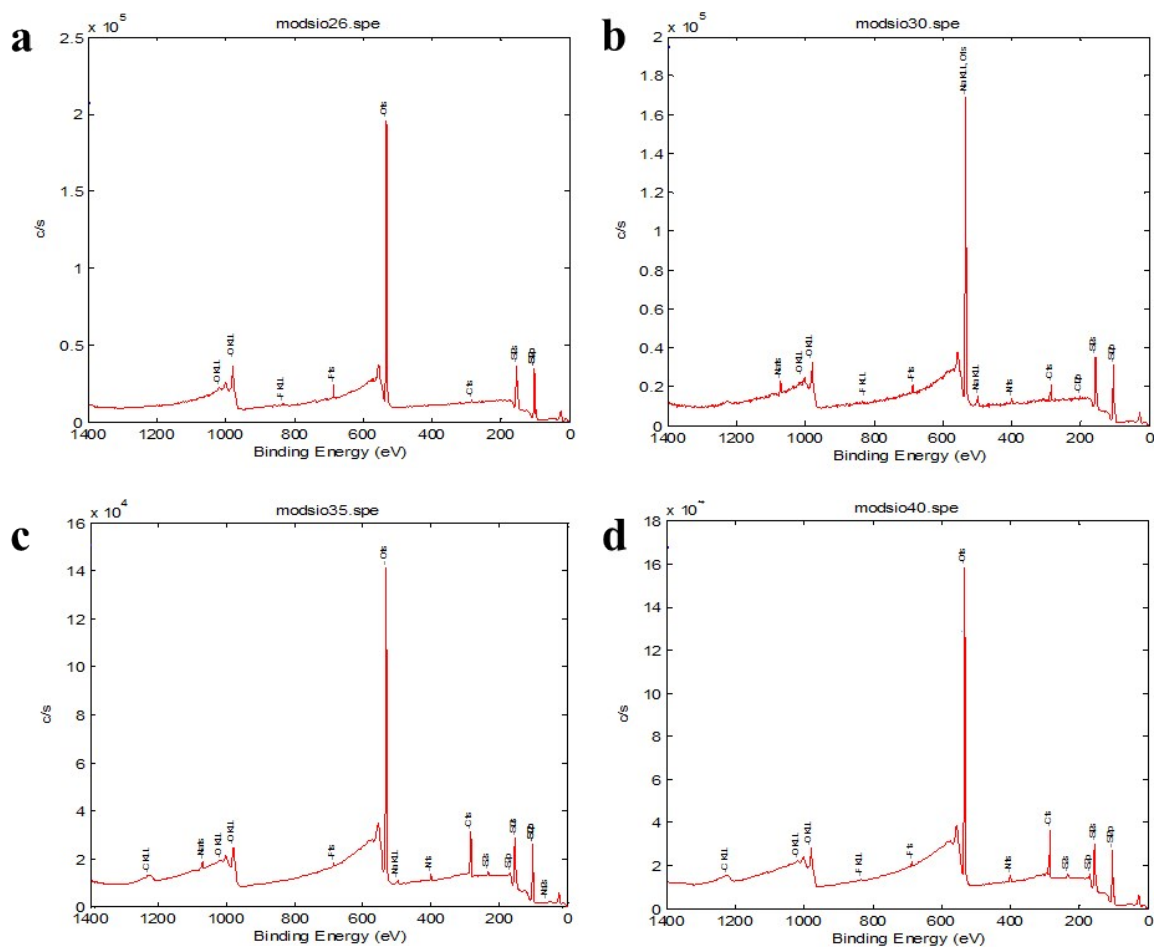

**Figure S3:** XPS representative survey spectra for the SiNPs before modification (a), after APDMES modification (b), after APDMES and HPTS modification (c), after APDMES and HPTS modification and DNA immobilization (d).

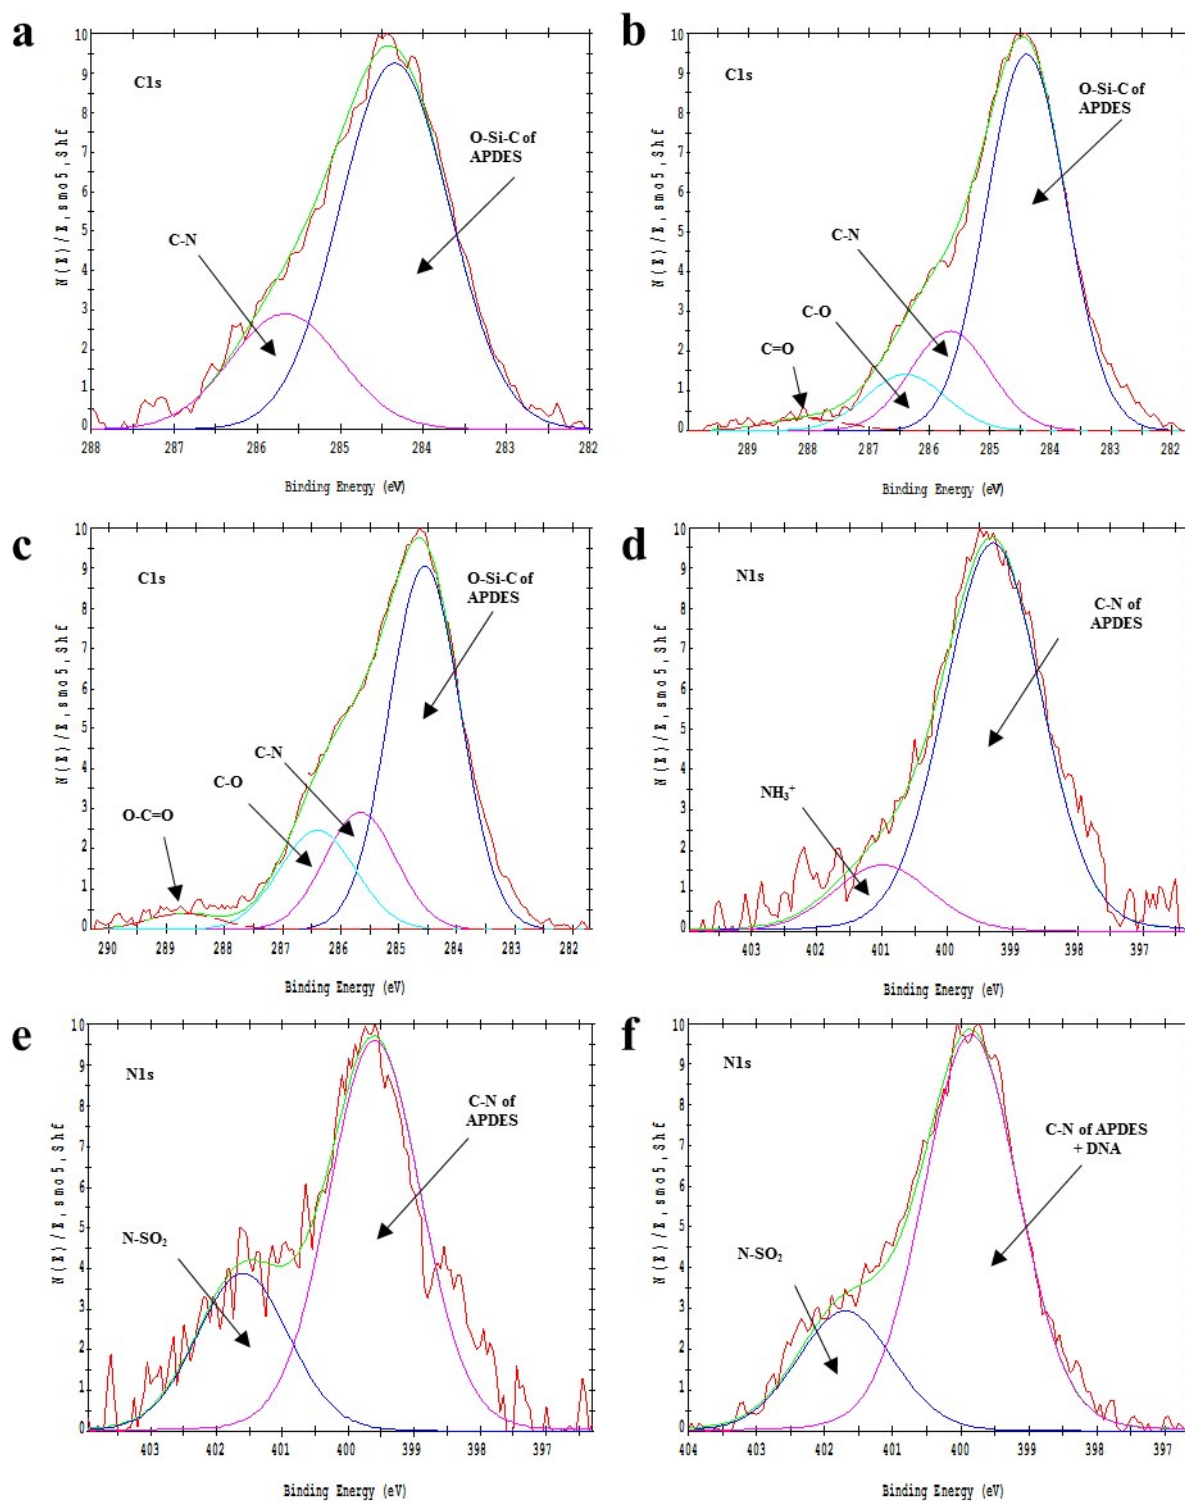

**Figure S4:** High-Resolution Multiplex spectra of SiNPs after APDMES modification (**a,d**), after APDMES and HPTS modification (**b,e**), after APDMES and HPTS modification and DNA immobilization (**c,f**). N-SO<sub>2</sub> peak at 401.1 eV determined in Döring (1988), Zeitschrift für anorganische und allgemeine Chemie.<sup>3</sup>



## Calculations of the average pH near silica surfaces<sup>4</sup>

### Photon source and units

1. LED light emitter power 9.4 mW at 390 nm.
2. Absorption cross section per HPTS molecule for  $\epsilon=60000 \text{ M}^{-1}\text{cm}^{-1}$  (at  $\lambda\approx 400 \text{ nm}$ )  
 $= 1.6 \times 10^{-16} \text{ cm}^2$ .
3. Illuminated area by the LED emitter 1.5 mm  $= 1.76 \times 10^{-2} \text{ cm}^2$ .
4. Light intensity (power/cm<sup>2</sup>) on a silica surface:  $9.4 \times 10^{-3} / 0.0176 = 0.55 \text{ watt/cm}^2$ .

### Conversion of light power to photon flux and proton released per second

5. Photon flux  $= 0.55 / (3 \times 1.6 \times 10^{-19}) = 1.2 \times 10^{18} \text{ photons/cm}^2 \cdot \text{sec}$ .
6. Adsorbed HPTS molecules per cm<sup>2</sup>  $= 2 \times 10^{13} \text{ molecules/cm}^2$ .
7. Light power absorbed by molecules per second  $= 1.6 \times 10^{-16} \times 2 \times 10^{13} \times 0.55 \text{ W/cm}^2$   
 $= 1.76 \text{ mW/cm}^2$ .
8. Number of released protons per second  $= 1.76 \times 10^{-3} / 4.8 \times 10^{-19} = 3.66 \times 10^{15}$   
proton/sec.
9.  $3.3 \times 10^{18}$  photons in 1J = 1Watt/second (3 eV per photon).
10. This large number of released protons recombine with HPTS RO<sup>-</sup> to reform ROH.

### Proton Recombination Consideration

A photocycle ends at about 0.1 mili-second. The photocycle ends when the photo-proton recombines with the ground state HPTS to reform the protonated photoacid.

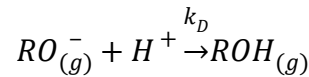

The reaction is bimolecular and thus the recombination rate decreases as

$$\frac{dC_{H^+}}{dt} = k_D [C_{H^+}] [C_{HPTS^*}] = k_D [C_{H^+}]^2$$

The second order kinetics complicates the calculation of the effective pH next to the illuminated surface area. The rate decreases as the time progresses because the proton concentration decreases. This reaction takes place in the ground state. For a double charged RO<sup>-</sup>, the diffusion controlled rate is  $k_D \approx 10^{10} \text{ s}^{-1}$ .

Where  $N' = \frac{N_A}{1000} \cong 6 \times 10^{20}$ ,  $R_D$  is the Debye radius,  $k_D \cong 4\pi N' D_{H^+} R_D$ ,  $R_D = \frac{ze^2}{4\pi\epsilon_0\epsilon_{H_2O}^{bulk} K_B T}$ ,  $z$  the HPTS charge is -2,  $e$  the electron charge,  $\epsilon_0$  is the permittivity constant,  $T$  the room temperature.

The pseudo first order reaction rate  $k'_D = k_D \cdot C_{H^+}$  depends on  $C_{H^+}$ . For  $\text{pH} \approx 5$   $k'_D = 10^{10} \times 10^{-5} = 10^5 \text{ s}^{-1}$  and in a homogeneous proton distribution it takes  $10^{-5}$  seconds for the proton to recombine with the  $\text{RO}^-$  of HPTS and the emitted proton reach a low level of  $\text{pH} 5$ . The proton production rate by the light source and the pseudo first order recombination rate constant  $k_D \cdot C_{H^+}$  determine the average  $\text{pH}$ . The photo-proton production by the ESPT process per second is  $3.66 \times 10^{15}$  proton/sec. If we assume that the photocycle ends at  $10^{-4}$  second and the proton that recombine are lost, then the production of protons at this time window of  $10^{-4}$  seconds would be  $3.6 \times 10^{15} \times 10^{-4} = 3.66 \times 10^{11}$  proton/ $\text{cm}^2$ .

Assuming two dimensional proton diffusion next to the surface, the proton is limited to diffuse within a thin water layer with a thickness of  $\sim 100 \text{ \AA}$  (10 nm),<sup>5</sup> and our active bio-layer has an average thickness of  $\sim 3\text{-}5 \text{ nm}$  (40  $\text{ \AA}$  average). We derive the value of the layer thickness from our previous study where we found that the proton movements are next to the silica surface and do not escape to the bulk. The plausible reason for the two-dimensional proton diffusion is the APTES base adsorbed on the silica and the large negative charge of adsorbed HPTS. Thus the proton diffusion volume per  $\text{cm}^2$  is  $10^{-6} \text{ cm}^3$  and the proton average concentration in molecules per  $\text{cm}^3$  is  $N_{H^+} = 3.66 \times 10^{11} / 6 \times 10^{-7} = 6.1 \times 10^{17}$  protons/ $\text{cm}^3$ . 1M is equivalent to  $6 \times 10^{23}$  molecules per liter and thus  $6 \times 10^{20}$  per  $\text{cm}^3$ , and the proton concentration  $C_{H^+} = 6.1 \times 10^{17} / 6 \times 10^{20} = 1 \times 10^{-3} \text{ M}$ . Thus for  $\tau = 10^{-4} \text{ s}$ , the smallest average  $\text{pH}$  is  $\sim 2.9$ . This calculation is based on a homogenous 2 dimensional diffusion space and a proton diffusion of  $D = 0.8 \times 10^{-4} \text{ cm}^2/\text{s}$  as was estimated from our previous study.<sup>2</sup>

## ICP-MS measurements

Inductively Coupled Plasma Mass Spectrometry (ICP-MS, Agilent Technologies 7700 Series) was used for detection of total Uranium concentrations in all the samples. A full quant analysis of Uranium was performed with ICP-MS, with 10 points of calibration (0-1000 ng/mL) with known concentrations of Uranium. During the detection of Uranium in samples, Gd (1 mg/L) was used as an instrumental internal standard to monitor the stability of ionization efficiency in time. The ICP-MS data were processed with instrumental software (MassHunter 4.1 version C.01.01, 2015).

## BET mesurments information and results

Measurements were performed by Particle Testing Authority via Dr. Golik Scientific solutions, utilizing TriStar II Plus indtrument. Analysis adsorptive: Kr, Analysis bath temp.: 77.300 K, Thermal correction: no, Equilibration interval: 10 s, Low pressure dose: none , Sample density: 1.000 g/cm<sup>3</sup>, Automatic degas: no, Correlation coefficient: 0.9999157, Molecular cross-sectional area: 0.2100 nm<sup>2</sup> Sample was kept under vacuum at 100°C for 960 minutes, analyzed per ISO 9277, reference material(s) used for instrument performance verification available upon request.

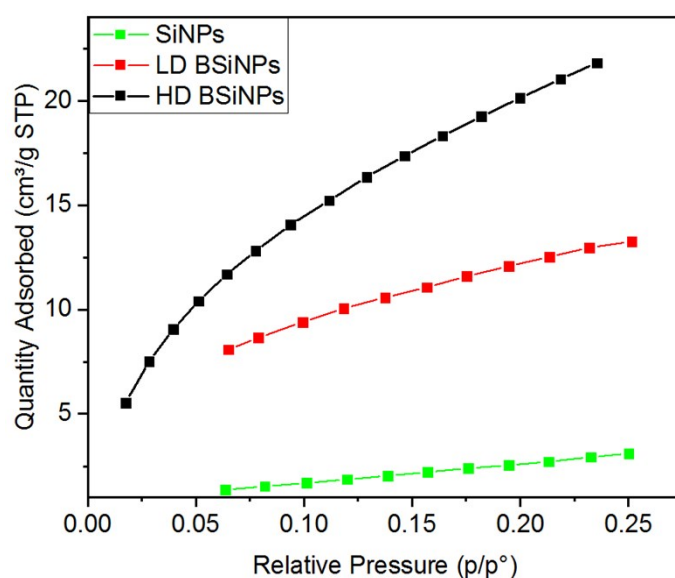

**Figure S5:** Isotherm linear plots of measurements for SiNP array (green curve), BSiNWs arrays of low density (red curve) and high density (black curve).

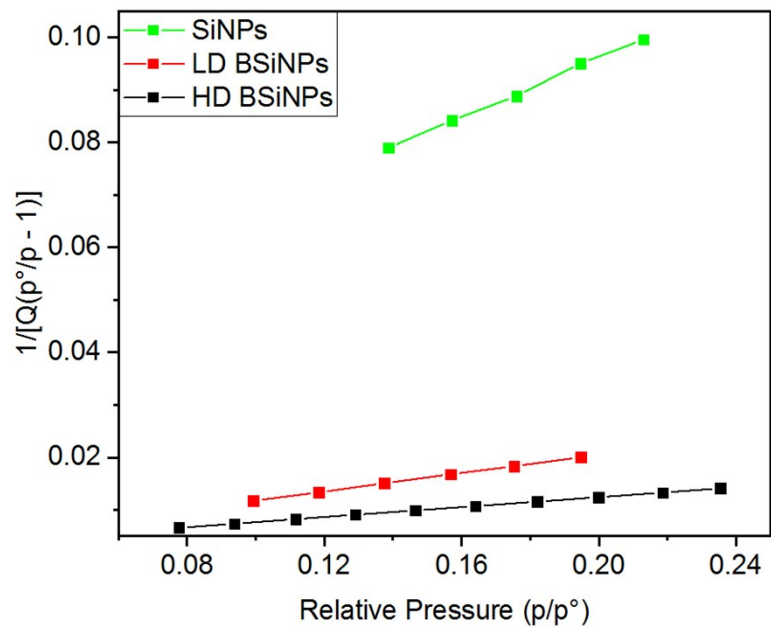

**Figure S6:** BET surface area plots of measurements for SiNP array (red curve), BSiNWs arrays of low density (green curve) and high density (black curve).

## References

- (1) Krivitsky, V.; Hsiung, L.-C.; Lichtenstein, A.; Brudnik, B.; Kantaev, R.; Elnathan, R.; Pevzner, A.; Khatchourints, A.; Patolsky, F. Si Nanowires Forest-Based On-Chip Biomolecular Filtering, Separation and Preconcentration Devices: Nanowires Do It All. *Nano Lett.* **2012**, *12* (9), 4748–4756. <https://doi.org/10.1021/nl3021889>.
- (2) Soroka, H. P.; Simkovitch, R.; Kosloff, A.; Shomer, S.; Pevzner, A.; Tzang, O.; Tirosh, R.; Patolsky, F.; Huppert, D. Excited-State Proton Transfer and Proton Diffusion near Hydrophilic Surfaces. *J. Phys. Chem. C* **2013**, *117* (48), 25786–25797. <https://doi.org/10.1021/jp4087514>.
- (3) Döring, M.; Uhlig, E.; Nefedov, V. I.; Salyn, I. V. Komplexbildung mit sulfonamidsubstituierten Thionoliganden. *Zeitschrift für anorganische und allgemeine Chemie* **1988**, *563* (1), 105–115. <https://doi.org/10.1002/zaac.19885630115>.
- (4) Peretz-Soroka, H.; Pevzner, A.; Davidi, G.; Naddaka, V.; Kwiat, M.; Huppert, D.; Patolsky, F. Manipulating and Monitoring On-Surface Biological Reactions by Light-Triggered Local PH Alterations. *Nano Lett.* **2015**, *15* (7), 4758–4768. <https://doi.org/10.1021/acs.nanolett.5b01578>.
- (5) Hartlen, K. D.; Athanasopoulos, A. P. T.; Kitaev, V. Facile Preparation of Highly Monodisperse Small Silica Spheres (15 to >200 Nm) Suitable for Colloidal Templating and Formation of Ordered Arrays. *Langmuir* **2008**, *24* (5), 1714–1720. <https://doi.org/10.1021/la7025285>.
